# Supplementary material for: Influence of Yoga-Based Personality Development Program on Psychomotor Performance and Self-efficacy in School Children
Source: PubMed Central journal article supplement (PMC4908105; doi:10.3389/fped.2016.00062), 2016-06-15

# Trail Making Test Part A

Patient's Name: \_\_\_\_\_

Date: \_\_\_\_\_

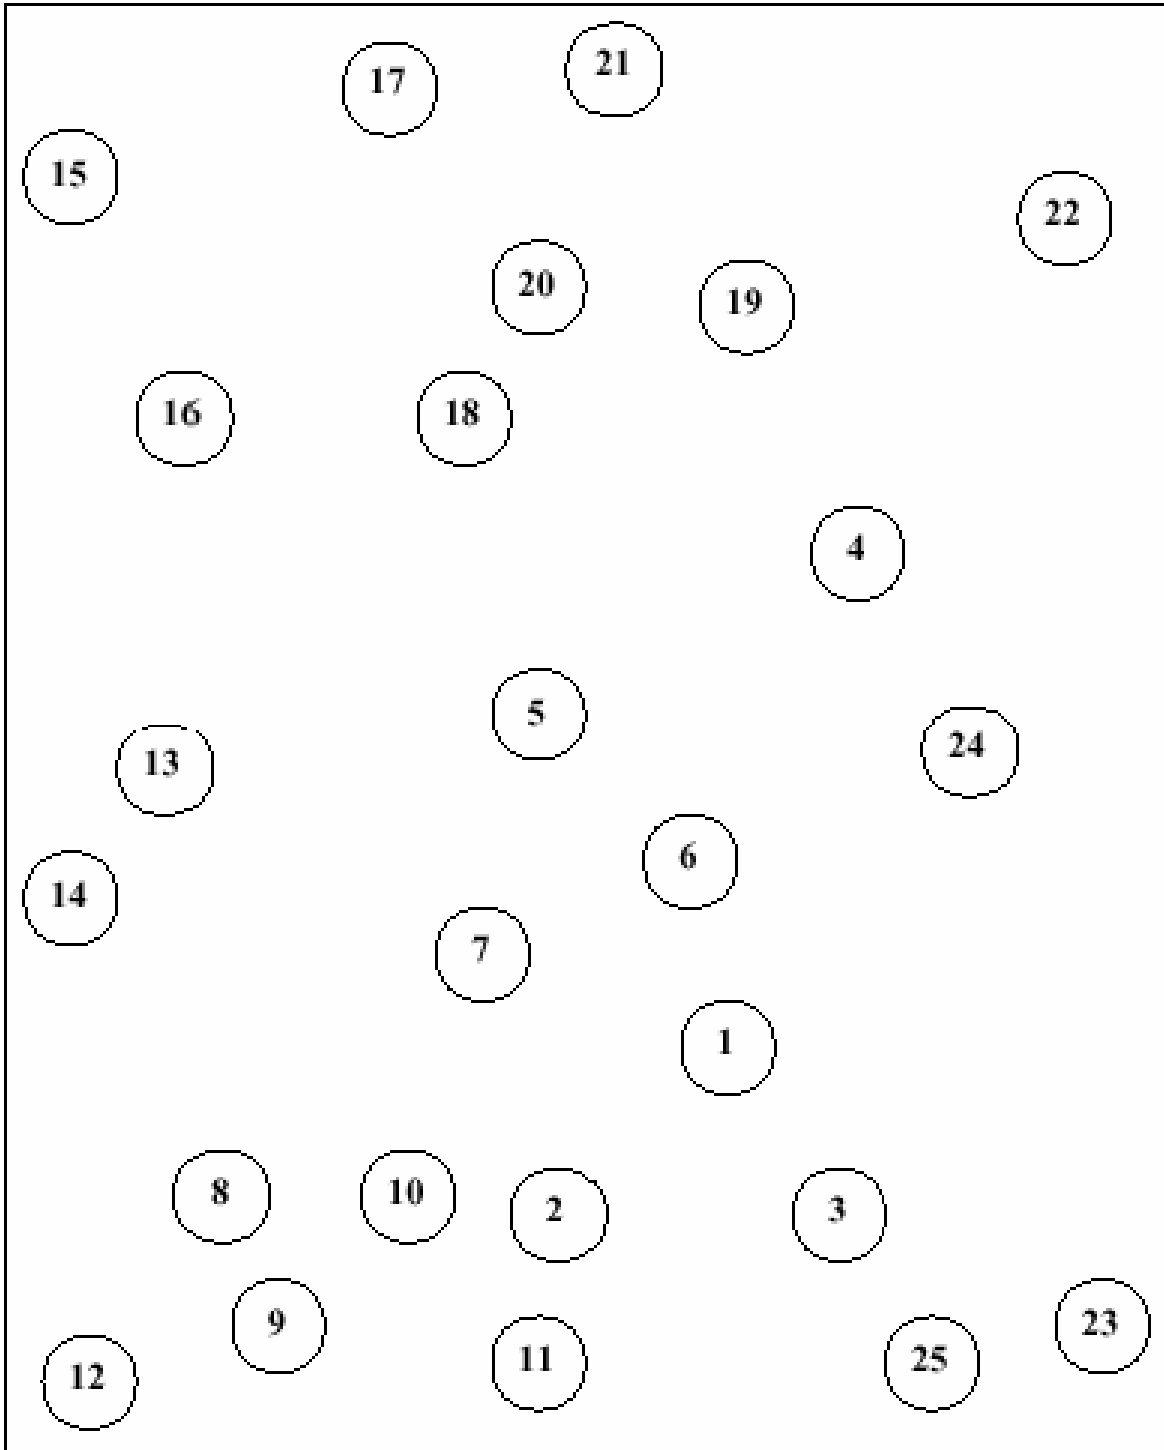

## Trail Making Test Part A – *SAMPLE*

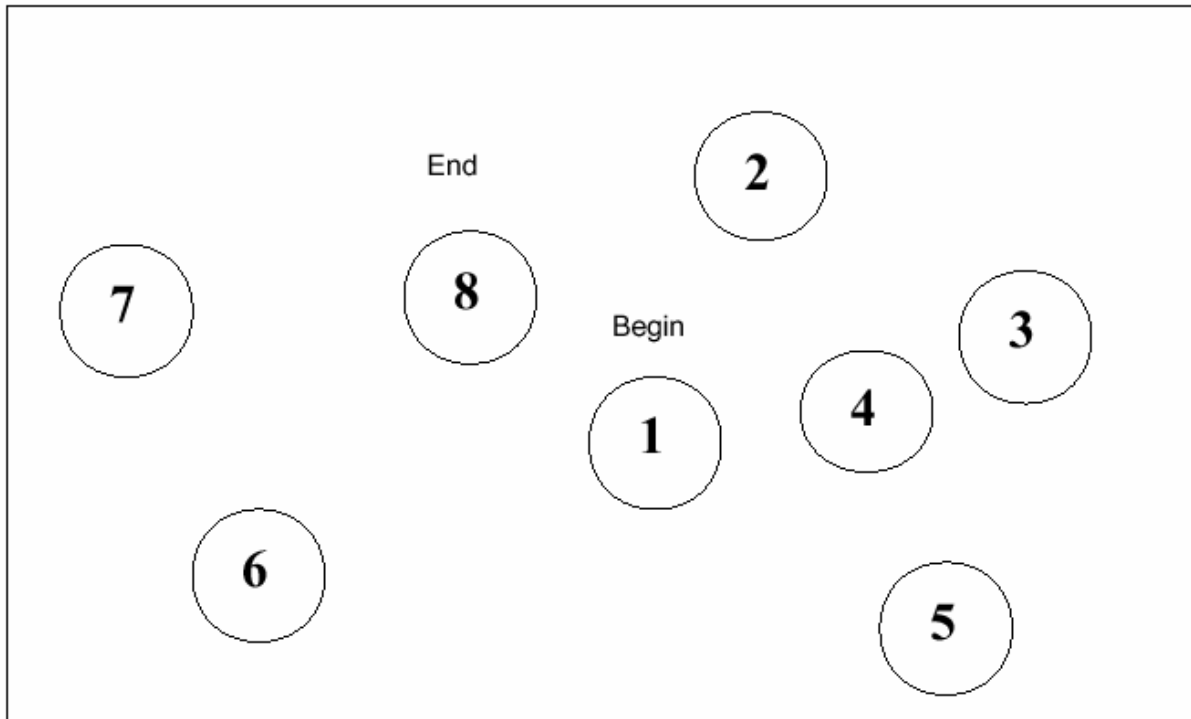

# Trail Making Test Part B

Patient's Name: \_\_\_\_\_

Date: \_\_\_\_\_

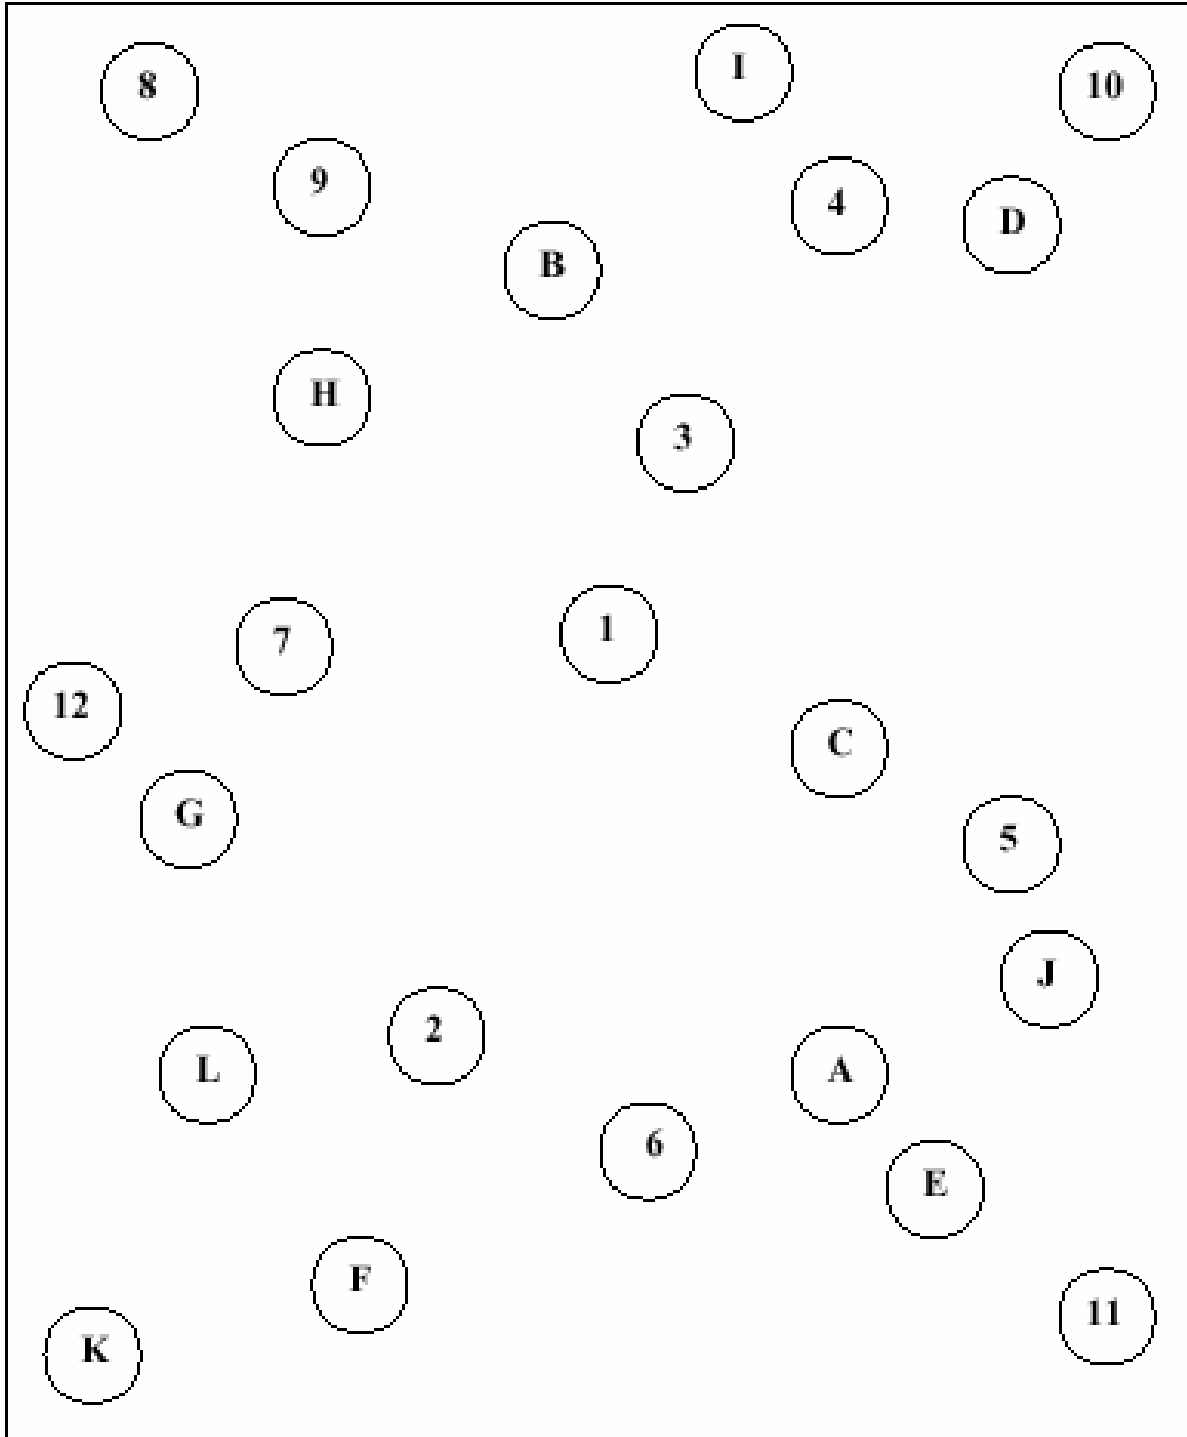

**Trail Making Test Part B – SAMPLE**

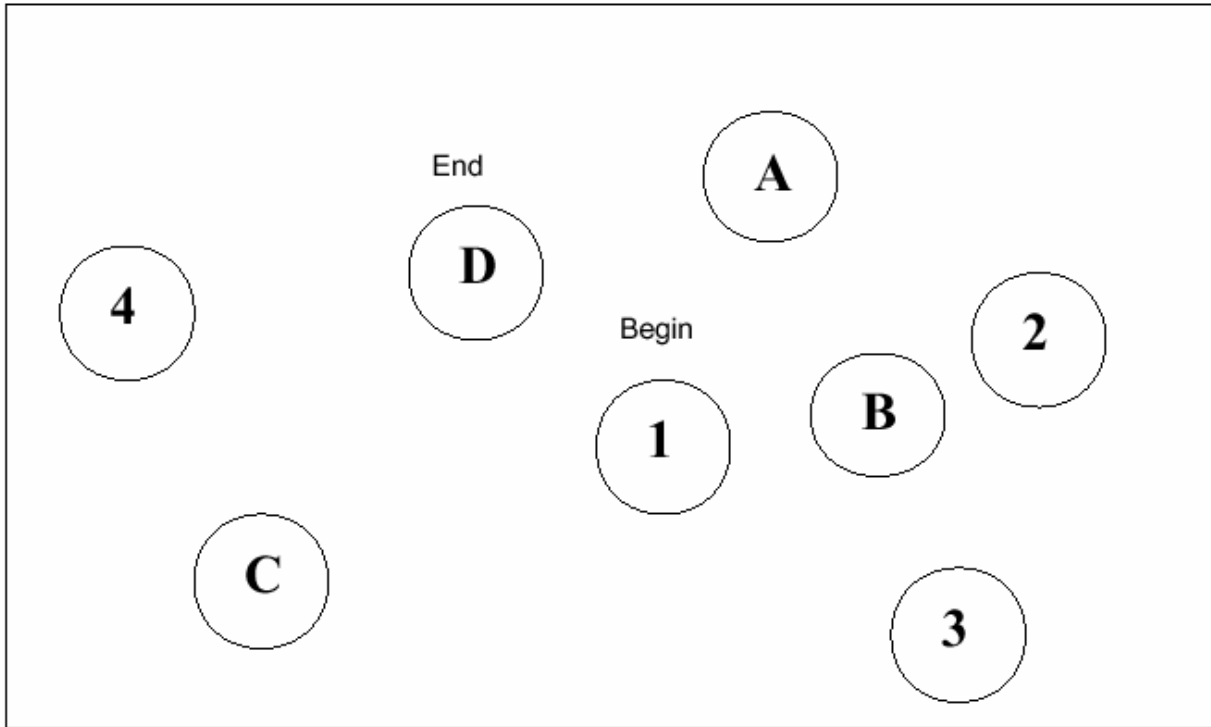

Supplement: image_1.pdf [file image_1.pdf]
