# Supplementary material for: Influence of Yoga-Based Personality Development Program on Psychomotor Performance and Self-efficacy in School Children
Source: PubMed Central journal article supplement (PMC4908105; doi:10.3389/fped.2016.00062), 2016-06-15
Supplement: image_2.pdf [file image_2.pdf]

**Self-Efficacy Questionnaire for Children (SEQ-C)**  
*Brief Survey on Academic, Social and Emotional Self-Efficacy*

|     |                                                                                         | Not at all            |                       |                       |                       | Very well             |
|-----|-----------------------------------------------------------------------------------------|-----------------------|-----------------------|-----------------------|-----------------------|-----------------------|
|     |                                                                                         | 1                     | 2                     | 3                     | 4                     | 5                     |
| 1.  | How well can you get teachers to help you when you get stuck on schoolwork?             | <input type="radio"/> | <input type="radio"/> | <input type="radio"/> | <input type="radio"/> | <input type="radio"/> |
| 2.  | How well can you express your opinions when other classmates disagree with you?         | <input type="radio"/> | <input type="radio"/> | <input type="radio"/> | <input type="radio"/> | <input type="radio"/> |
| 3.  | How well do you succeed in cheering yourself up when an unpleasant event has happened?  | <input type="radio"/> | <input type="radio"/> | <input type="radio"/> | <input type="radio"/> | <input type="radio"/> |
| 4.  | How well can you study when there are other interesting things to do?                   | <input type="radio"/> | <input type="radio"/> | <input type="radio"/> | <input type="radio"/> | <input type="radio"/> |
| 5.  | How well do you succeed in becoming calm again when you are very scared?                | <input type="radio"/> | <input type="radio"/> | <input type="radio"/> | <input type="radio"/> | <input type="radio"/> |
| 6.  | How well can you become friends with other children?                                    | <input type="radio"/> | <input type="radio"/> | <input type="radio"/> | <input type="radio"/> | <input type="radio"/> |
| 7.  | How well can you study a chapter for a test?                                            | <input type="radio"/> | <input type="radio"/> | <input type="radio"/> | <input type="radio"/> | <input type="radio"/> |
| 8.  | How well can you have a chat with an unfamiliar person?                                 | <input type="radio"/> | <input type="radio"/> | <input type="radio"/> | <input type="radio"/> | <input type="radio"/> |
| 9.  | How well can you prevent to become nervous?                                             | <input type="radio"/> | <input type="radio"/> | <input type="radio"/> | <input type="radio"/> | <input type="radio"/> |
| 10. | How well do you succeed in finishing all your homework every day?                       | <input type="radio"/> | <input type="radio"/> | <input type="radio"/> | <input type="radio"/> | <input type="radio"/> |
| 11. | How well can you work in harmony with your classmates?                                  | <input type="radio"/> | <input type="radio"/> | <input type="radio"/> | <input type="radio"/> | <input type="radio"/> |
| 12. | How well can you control your feelings?                                                 | <input type="radio"/> | <input type="radio"/> | <input type="radio"/> | <input type="radio"/> | <input type="radio"/> |
| 13. | How well can you pay attention during every class?                                      | <input type="radio"/> | <input type="radio"/> | <input type="radio"/> | <input type="radio"/> | <input type="radio"/> |
| 14. | How well can you tell other children that they are doing something that you don't like? | <input type="radio"/> | <input type="radio"/> | <input type="radio"/> | <input type="radio"/> | <input type="radio"/> |
| 15. | How well can you give yourself a pep-talk when you feel low?                            | <input type="radio"/> | <input type="radio"/> | <input type="radio"/> | <input type="radio"/> | <input type="radio"/> |
| 16. | How well do you succeed in understanding all subjects in school?                        | <input type="radio"/> | <input type="radio"/> | <input type="radio"/> | <input type="radio"/> | <input type="radio"/> |
| 17. | How well can you tell a funny event to a group of children?                             | <input type="radio"/> | <input type="radio"/> | <input type="radio"/> | <input type="radio"/> | <input type="radio"/> |
| 18. | How well can you tell a friend that you don't feel well?                                | <input type="radio"/> | <input type="radio"/> | <input type="radio"/> | <input type="radio"/> | <input type="radio"/> |
| 19. | How well do you succeed in satisfying your parents with your schoolwork?                | <input type="radio"/> | <input type="radio"/> | <input type="radio"/> | <input type="radio"/> | <input type="radio"/> |
| 20. | How well do you succeed in staying friends with other children?                         | <input type="radio"/> | <input type="radio"/> | <input type="radio"/> | <input type="radio"/> | <input type="radio"/> |
| 21. | How well do you succeed in suppressing                                                  | <input type="radio"/> | <input type="radio"/> | <input type="radio"/> | <input type="radio"/> | <input type="radio"/> |

- |     |                                                                         |                       |                       |                       |                       |                       |
|-----|-------------------------------------------------------------------------|-----------------------|-----------------------|-----------------------|-----------------------|-----------------------|
|     | unpleasant thoughts?                                                    | <input type="radio"/> | <input type="radio"/> | <input type="radio"/> | <input type="radio"/> | <input type="radio"/> |
| 22. | How well do you succeed in passing a test?                              | <input type="radio"/> | <input type="radio"/> | <input type="radio"/> | <input type="radio"/> | <input type="radio"/> |
| 23. | How well do you succeed in preventing quarrels with other children?     | <input type="radio"/> | <input type="radio"/> | <input type="radio"/> | <input type="radio"/> | <input type="radio"/> |
| 24. | How well do you succeed in not worrying about things that might happen? | <input type="radio"/> | <input type="radio"/> | <input type="radio"/> | <input type="radio"/> | <input type="radio"/> |
- 

### Scoring

A total self-efficacy score can be obtained by summing across all items.

Items 1, 4, 7, 10, 13, 16, 19, and 22 = Academic self-efficacy

Items 2, 6, 8, 11, 14, 17, 20, and 23 = Social self-efficacy

Items 3, 5, 9, 12, 15, 18, 21, and 24 = Emotional self-efficacy
